# Supplementary material for: Biocompatibility of Root Canal Sealers: A Systematic Review of In Vitro and In Vivo Studies
Source: PubMed Central journal article supplement (PMC6947586; doi:10.3390/ma12244113), 2019-12-09

*Supplementary Materials*

# **Biocompatibility of Root Canal Sealers: A Systematic Review of In Vitro and In Vivo Studies**

**Diogo Afonso Fonseca <sup>1,\*</sup>, Anabela Baptista Paula <sup>2</sup>, Carlos Miguel Marto <sup>2,3</sup>, Ana Coelho <sup>2</sup>, Siri Paulo <sup>4</sup>, José Pedro Martinho <sup>4</sup>, Eunice Carrilho <sup>2</sup> and Manuel Marques Ferreira <sup>4</sup>**

<sup>1</sup> Institute of Endodontics, Coimbra Institute for Clinical and Biomedical Research (iCBR), CIBB Center for Innovative Biomedicine and Biotechnology, Faculty of Medicine, University of Coimbra; 3000-075 Coimbra, Portugal

<sup>2</sup> Institute of Integrated Clinical Practice, Coimbra Institute for Clinical and Biomedical Research (iCBR), CIBB Center for Innovative Biomedicine and Biotechnology, CIMAGO – Center of Investigation on Environment, Genetics and Oncobiology, CNC.IBILL, Faculty of Medicine, University of Coimbra; 3000-075 Coimbra, Portugal; anabelabppaula@sapo.pt (A.B.P.), mig-marto@hotmail.com (C.M.M.), anasofiacelho@gmail.com (A.C.), eunicecarrilho@gmail.com (E.C.)

<sup>3</sup> Institute of Experimental Pathology, Faculty of Medicine, University of Coimbra; 3000-075 Coimbra, Portugal

<sup>4</sup> Institute of Endodontics, Coimbra Institute for Clinical and Biomedical Research (iCBR), CIBB Center for Innovative Biomedicine and Biotechnology, CIMAGO – Center of Investigation on Environment, Genetics and Oncobiology, CNC.IBILL, Faculty of Medicine, University of Coimbra; 3000-075 Coimbra, Portugal; sirivpaulo@gmail.com (S.P.), josepedromartinho@gmail.com (J.P.M.), m.mferreira@netcabo.pt (M.M.F.)

\* Correspondence: diogo.andre.fonseca@gmail.com; Tel.: +351-239-249-151

Received: 19 November 2019; Accepted: 6 December 2019; Published: date

**Table S1.** Commercially available root canal sealers used in the studies included in this systematic review.

| Type             | Sealer                    | Manufacturer                                       | In vitro                                | In vivo                                                                                                   |
|------------------|---------------------------|----------------------------------------------------|-----------------------------------------|-----------------------------------------------------------------------------------------------------------|
| ZnO-eugenol      | PCS                       | Kerr, Romulus, USA                                 | [24,27,29,34–36,44,45,61,62,66,90,88]   | [95,107]                                                                                                  |
|                  | PCS Extended Working Time | Kerr, Romulus, USA                                 | [42,43]                                 | [100]                                                                                                     |
|                  | N2®                       | Indrag-Agsa, Losone, Switzerland                   | [48,58–60,65,80,81]                     | –                                                                                                         |
|                  | Endofill                  | Produits Dentaires, Vevey Switzerland              | [20,35,41,78]                           | [93]                                                                                                      |
|                  | Canals                    | Showa Pharmaceutical Co., Tokyo, Japan             | [58–60]                                 | –                                                                                                         |
|                  | Endométhasone             | Septodont, Saint-Maur-des-Fossés, France           | [48,65]                                 | [97,106]                                                                                                  |
|                  | Roth's Sealer             | Roth International, Chicago, USA                   | [53,74]                                 | –                                                                                                         |
|                  | Grossman's sealer         | Sultan Chemists, Englewood, USA                    | [31]                                    | [103]                                                                                                     |
|                  | Zinc Oxide-Eugenol (ZOE)  | Produits Dentaires, Vevey Switzerland              | [46,55]                                 | –                                                                                                         |
|                  | Tubli-Seal™               | Kerr, Romulus, USA                                 | [22,39]                                 | –                                                                                                         |
|                  | Tubli-Seal Xpress™        | Kerr, Romulus, USA                                 | [75]                                    | –                                                                                                         |
|                  | Cortisomol™               | Pierre Rolland, Merignac, France                   | [47]                                    | –                                                                                                         |
|                  | Intrafill                 | Dentsply Ind. e Com. Ltda., Petrópolis, RJ, Brazil | –                                       | [109]                                                                                                     |
|                  | Resin (epoxy)             | AH Plus™                                           | Dentsply DeTrey Gmbh, Konstanz, Germany | [17,20,22,23,30,32,33,37,38,43,44,47,48,<br>50,52,53,55–57,61,64–<br>66,68,69,71,74,76–78,82,84,85,89,91] |
| AH 26®           |                           | Dentsply DeTrey Gmbh, Konstanz, Germany            | [17,55,56,58–60,79–81,83,87,91]         | [102,104]                                                                                                 |
| AH Plus Jet®     |                           | Dentsply DeTrey Gmbh, Konstanz, Germany            | [25,29,36,39,40,49,54,75]               | –                                                                                                         |
| Acroseal         |                           | Septodont, Saint-Maur-des-Fossés, France           | [23,89]                                 | –                                                                                                         |
| SimpliSeal®      |                           | Discuss Dental LLC, Calver City, USA               | [20,73]                                 | –                                                                                                         |
| TopSeal®         |                           | Dentsply DeTrey Gmbh, Konstanz, Germany            | [34,38]                                 | –                                                                                                         |
| Sealer Plus      |                           | MK Life, Porto Alegre, Brazil                      | [20]                                    | –                                                                                                         |
| ThermaSeal®      |                           | Dentsply/Maillefer, Konstanz, Germany              | [31]                                    | –                                                                                                         |
| ThermaSeal® Plus |                           | Dentsply/Maillefer, Konstanz, Germany              | [53]                                    | –                                                                                                         |

|                             |                    |                                               |                                          |                    |
|-----------------------------|--------------------|-----------------------------------------------|------------------------------------------|--------------------|
|                             | Sicura Seal        | Dentalica, Milano, Italy                      | [38]                                     | –                  |
| <b>Resin (methacrylate)</b> | EndoREZ®           | Ultradent, South Jordan, USA                  | [22,27,30,34,50,54,82,84]                | [95,97,101,108]    |
|                             | Epiphany®          | Pentron, Wallingford, USA                     | [28,30–32,37,88,89]                      | [93,96,98,107,109] |
|                             | Epiphany® SE       | Pentron, Wallingford, USA                     | [41,88]                                  | –                  |
|                             | RealSeal™          | SybronEndo, Orange, USA                       | [27,52,54,83]                            | [95]               |
|                             | RealSeal SE™       | SybronEndo, Orange, USA                       | [27,53]                                  | –                  |
|                             | RealSeal XT        | SybronEndo, Orange, USA                       | [25]                                     | [105]              |
|                             | MetaSEAL™          | Parkell, Inc., Farmington, USA                | [27,29]                                  | –                  |
|                             | MetaSEAL™ Soft     | Sun Medical, Tokyo, Japan                     | [39]                                     | –                  |
| <b>Glass ionomer</b>        | Ketac™ Endo        | 3M ESPE, St. Paul, USA                        | [48,65]                                  | –                  |
|                             | Activ GP™          | Brasseler, Savannah, USA                      | [83]                                     | –                  |
| <b>Silicone</b>             | GuttaFlow®         | Roeko/Coltène/Whaledent, Langenau, Germany    | [32,39,50,53,75,84]                      | –                  |
|                             | GuttaFlow®2        | Roeko/Coltène/Whaledent, Langenau, Germany    | [52,64,77]                               | [92]               |
|                             | GuttaFlow® Bioseal | Roeko/Coltène/Whaledent, Langenau, Germany    | [64]                                     | [92]               |
|                             | RoekoSeal          | Roeko/Coltène/Whaledent, Langenau, Germany    | [34,48,82]                               | [109]              |
|                             | RoekoSeal Automix  | Roeko/Coltène/Whaledent, Langenau, Germany    | [30,33,90]                               | [104,110]          |
| <b>Calcium hydroxide</b>    | Sealapex™          | Kerr, Romulus, USA                            | [22,26,31,47,53,80,81,90]                | [113]              |
|                             | Sealapex Xpress™   | SybronEndo, Orange, USA                       | –                                        | [105]              |
|                             | Apexit®            | Ivoclar Vivadent, Schaan, Liechtenstein       | [48,50,65,84]                            | –                  |
|                             | Apexit® Plus       | Ivoclar Vivadent, Schaan, Liechtenstein       | [39]                                     | –                  |
|                             | Sealer 26          | Dentsply/Maillefer, Konstanz, Germany         | [78]                                     | [102,113]          |
| <b>Bioactive</b>            | MTA Fillapex®      | Angelus, Londrina, Brazil                     | [23,26,39,40,41,51,57,61,64,66,71,73,76] | [103,112]          |
|                             | MTA Angelus®       | Angelus, Londrina, Brazil                     | [21,57,71]                               | –                  |
|                             | BioRoot™ RCS       | Septodont, Saint-Maur-des-Fossés, France      | [24,45,49,61–63,66,73]                   | –                  |
|                             | Endosequence BC™   | Brasseler, Savannah, USA                      | [43,49,51,74–76]                         | –                  |
|                             | iRoot® SP          | Innovative BioCeramix Inc., Vancouver, Canada | [26,40,68,72,86]                         | –                  |

---

|                     |                                               |            |       |
|---------------------|-----------------------------------------------|------------|-------|
| iRoot® BP Plus      | Innovative BioCeramix Inc., Vancouver, Canada | [46,67,70] | –     |
| iRoot® FS           | Innovative BioCeramix Inc., Vancouver, Canada | [67,70]    | –     |
| ProRoot® ES         | Dentsply Tulsa Dental, Tulsa, USA             | [74]       | –     |
| Endoseal® MTA       | Maruchi, Seoul, Korea                         | [63]       | –     |
| MTA High plasticity | Angelus, Londrina, Brazil                     | [21]       | –     |
| Apatite Root Sealer | Sankin Kogyo, Tokyo, Japan                    | [26,42]    | [100] |

---

**Table S2.** Results of risk of bias assessment of in vitro studies according to the guidelines for reporting of preclinical studies on dental materials by Faggion Jr. [18].

| Study                          | Checklist item |    |    |   |   |   |   |   |   |   |    |    |    |    |    |
|--------------------------------|----------------|----|----|---|---|---|---|---|---|---|----|----|----|----|----|
|                                | 1              | 2a | 2b | 3 | 4 | 5 | 6 | 7 | 8 | 9 | 10 | 11 | 12 | 13 | 14 |
| Lee et al. [76]                | Y              | Y  | Y  | Y | Y | N | N | N | N | N | Y  | N  | N  | Y  | N  |
| Jeanneau et al. [62]           | Y              | Y  | Y  | Y | Y | N | N | N | N | N | Y  | N  | N  | Y  | N  |
| Giacomino et al. [74]          | Y              | Y  | Y  | N | Y | N | N | N | N | N | Y  | N  | N  | N  | N  |
| Jung et al. [66]               | Y              | Y  | Y  | Y | N | N | N | N | N | N | Y  | N  | Y  | N  | N  |
| Vouzara et al. [73]            | Y              | Y  | Y  | Y | Y | N | N | N | N | N | Y  | N  | N  | N  | N  |
| Alsubait et al. [49]           | Y              | Y  | Y  | Y | N | N | N | N | N | N | Y  | N  | Y  | Y  | N  |
| Jung et al. [61]               | Y              | Y  | Y  | Y | N | N | N | N | N | N | Y  | N  | Y  | Y  | N  |
| Szczurko et al. [39]           | Y              | Y  | Y  | Y | Y | N | N | N | N | N | Y  | N  | Y  | Y  | N  |
| Troiano et al. [38]            | Y              | Y  | Y  | Y | N | N | N | N | N | N | Y  | Y  | Y  | N  | N  |
| Arun et al. [22]               | Y              | Y  | Y  | Y | Y | N | N | N | N | N | Y  | Y  | Y  | N  | N  |
| Collado-González et al. [63]   | Y              | Y  | Y  | Y | N | N | N | N | N | N | Y  | N  | N  | Y  | N  |
| Collado-González et al. [64]   | Y              | Y  | Y  | Y | N | N | N | N | N | N | Y  | N  | N  | Y  | N  |
| Cintra et al. [21]             | Y              | Y  | Y  | Y | N | N | N | N | N | N | Y  | N  | N  | Y  | N  |
| Zhu et al. [72]                | Y              | Y  | Y  | Y | N | N | N | N | N | N | Y  | N  | N  | Y  | N  |
| Cintra et al. [20]             | Y              | Y  | Y  | Y | N | N | N | N | N | N | Y  | N  | N  | Y  | N  |
| Lv et al. [70]                 | Y              | Y  | Y  | Y | N | N | N | N | N | N | Y  | N  | N  | Y  | N  |
| Victoria-Escandell et al. [57] | Y              | Y  | Y  | Y | Y | N | N | N | N | N | Y  | Y  | N  | Y  | N  |
| Suciu et al. [23]              | Y              | Y  | Y  | Y | N | N | N | N | N | N | Y  | N  | N  | N  | N  |
| Camps et al. [45]              | Y              | Y  | Y  | Y | N | N | N | N | N | N | Y  | N  | N  | Y  | N  |
| Dimitrova-Nakov et al. [24]    | Y              | Y  | N  | Y | N | N | N | N | N | N | Y  | N  | N  | N  | N  |
| Konjhodzic-Prcic et al. [50]   | Y              | Y  | Y  | Y | Y | N | N | N | N | N | N  | Y  | N  | Y  | N  |
| Konjhodzic-Prcic et al. [84]   | Y              | N  | N  | Y | N | N | N | N | N | N | N  | Y  | N  | N  | N  |
| Zhou et al. [51]               | Y              | Y  | Y  | Y | Y | N | N | N | N | N | Y  | N  | Y  | Y  | N  |
| Silva et al. [77]              | Y              | Y  | Y  | Y | N | N | N | N | N | N | Y  | N  | N  | Y  | N  |
| Parirokh et al. [56]           | Y              | Y  | Y  | Y | N | N | N | N | N | N | Y  | N  | N  | Y  | N  |
| Jiang et al. [67]              | Y              | Y  | Y  | Y | Y | N | N | N | N | N | N  | N  | N  | Y  | N  |
| Cotti et al. [25]              | Y              | Y  | Y  | Y | Y | N | N | N | N | N | Y  | N  | N  | N  | N  |
| Chang et al. [26]              | Y              | Y  | Y  | Y | N | N | N | N | N | N | Y  | N  | N  | Y  | N  |
| Mandal et al. [52]             | Y              | Y  | Y  | Y | Y | N | N | N | N | N | Y  | N  | N  | N  | N  |
| Camargo et al. [82]            | Y              | Y  | Y  | Y | Y | N | N | N | N | N | Y  | N  | N  | Y  | N  |
| Güven et al. [40]              | Y              | Y  | Y  | Y | N | N | N | N | N | N | N  | N  | N  | N  | N  |
| Kim et al. [85]                | Y              | Y  | Y  | Y | N | N | N | N | N | N | Y  | N  | N  | N  | N  |
| De-Deus et al. [46]            | Y              | Y  | Y  | Y | N | N | Y | N | N | N | Y  | N  | Y  | Y  | N  |
| Bin et al. [71]                | Y              | Y  | Y  | Y | Y | N | N | N | N | N | Y  | N  | N  | N  | N  |
| Scelza et al. [53]             | Y              | Y  | Y  | Y | Y | N | N | N | N | N | Y  | N  | N  | Y  | N  |
| Salles et al. [41]             | Y              | Y  | Y  | Y | N | N | N | N | N | N | Y  | N  | N  | N  | N  |
| Landuyt et al. [54]            | Y              | Y  | Y  | Y | Y | N | N | N | N | N | Y  | Y  | N  | Y  | N  |
| Shon et al. [42]               | Y              | Y  | Y  | Y | N | N | N | N | N | N | Y  | N  | N  | N  | N  |

|                            |   |   |   |   |   |   |   |   |   |   |   |   |   |   |   |
|----------------------------|---|---|---|---|---|---|---|---|---|---|---|---|---|---|---|
| Mukhtar-Fayyad [86]        | Y | Y | Y | Y | Y | N | N | N | N | N | Y | N | N | N | N |
| Zoufan et al. [75]         | Y | Y | Y | Y | Y | N | N | N | N | N | Y | N | N | N | N |
| Loushine et al. [43]       | Y | Y | Y | Y | Y | Y | N | N | N | N | Y | Y | Y | N | N |
| Brackett et al. [36]       | Y | Y | Y | Y | Y | N | N | N | N | N | Y | N | N | N | N |
| Yu et al. [87]             | Y | Y | Y | Y | N | N | N | N | N | N | Y | N | N | N | N |
| Zhang et al. [68]          | Y | Y | Y | Y | N | N | N | N | N | N | Y | N | N | N | N |
| Huang et al. [58]          | Y | Y | Y | Y | Y | N | N | N | N | N | Y | N | N | Y | N |
| Bryan et al. [44]          | Y | Y | Y | Y | Y | Y | N | N | N | N | Y | N | N | N | N |
| Ames et al. [27]           | Y | Y | Y | Y | Y | N | N | N | N | N | Y | Y | N | Y | N |
| Donadio et al. [83]        | Y | Y | Y | Y | Y | N | N | N | N | N | Y | N | N | N | N |
| Gambarini et al. [88]      | Y | Y | Y | Y | Y | N | N | N | N | N | Y | Y | N | N | N |
| Camargo et al. [89]        | Y | Y | Y | Y | Y | N | N | N | N | N | Y | N | N | Y | N |
| Huang et al. [59]          | Y | Y | Y | Y | N | N | N | N | N | N | Y | N | Y | Y | N |
| Heitman et al. [28]        | Y | Y | Y | Y | Y | N | N | N | N | N | Y | N | Y | N | N |
| Valois and Azevedo [78]    | Y | Y | Y | Y | Y | N | N | N | N | N | Y | N | N | N | N |
| Pinna et al. [29]          | Y | Y | Y | Y | Y | Y | N | N | N | N | Y | Y | N | N | N |
| Huang et al. [60]          | Y | Y | Y | Y | N | N | N | N | N | N | Y | N | N | Y | N |
| Lodiené et al. [30]        | Y | Y | Y | Y | Y | N | N | N | N | N | Y | N | N | N | N |
| Lee et al. [80]            | Y | Y | Y | Y | N | N | N | N | N | N | Y | N | N | Y | N |
| Lee et al. [79]            | Y | Y | Y | N | N | N | N | N | N | N | Y | N | N | Y | N |
| Lee et al. [81]            | Y | Y | Y | Y | N | N | N | N | N | N | Y | N | N | N | N |
| Merdad et al. [37]         | Y | Y | Y | Y | Y | N | N | N | N | N | Y | N | N | Y | N |
| Key et al. [31]            | Y | Y | Y | Y | Y | N | N | N | N | N | Y | N | N | N | N |
| Bouillaguet et al. [32]    | Y | Y | Y | Y | Y | N | N | N | N | N | Y | N | N | N | N |
| Miletic et al. [33]        | Y | Y | Y | Y | Y | N | N | N | N | N | Y | N | N | N | N |
| Al-Awadhi et al. [90]      | Y | Y | Y | Y | Y | N | N | N | N | N | Y | Y | N | N | N |
| Bouillaguet et al. [34]    | Y | Y | Y | Y | Y | N | N | N | N | N | Y | N | N | N | N |
| Camps and About [47]       | Y | Y | Y | Y | Y | N | N | N | N | N | Y | Y | N | N | N |
| Mendes et al. [35]         | Y | Y | Y | Y | N | N | N | N | N | N | Y | N | N | N | N |
| Schwarze et al. [48]       | Y | Y | Y | Y | N | N | N | N | N | N | Y | N | N | N | N |
| Huang et al. [91]          | Y | Y | Y | Y | Y | N | N | N | N | N | Y | Y | N | Y | N |
| Schwarze et al. [65]       | Y | Y | Y | Y | N | N | N | N | N | N | Y | N | N | N | N |
| Azar et al. [55]           | Y | Y | Y | Y | Y | N | N | N | N | N | Y | Y | N | N | N |
| Huang et al. [17]          | Y | Y | Y | Y | Y | N | N | N | N | N | Y | Y | N | Y | N |
| Schweickl and Schmalz [69] | Y | Y | Y | N | Y | N | N | N | N | N | N | Y | N | N | N |

Abbreviations: N, No; Y, Yes. Checklist items: 1 – Structured abstract; 2a – Scientific background and rationale; 2b – Objectives and/or hypotheses; 3 – Intervention of each group; 4 – Outcomes definition; 5 – Sample size determination; 6 – Allocation sequence generation; 7 – Allocation concealment mechanism; 8 – Implementation; 9 – Blinding; 10 – Statistical methods; 11 – Outcomes and estimation; 12 – Limitations; 13 – Funding information; 14 – Protocol (if available)

**Table S3.** Results of risk of bias assessment of in vivo studies according to the Systematic Review Centre for Laboratory Animal Experimentation (SYRCLE)'s risk of bias tool [19].

| Study                       | Checklist item |   |   |   |   |   |   |   |   |                |
|-----------------------------|----------------|---|---|---|---|---|---|---|---|----------------|
|                             | 1              | 2 | 3 | 4 | 5 | 6 | 7 | 8 | 9 | 10             |
| Santos et al. [92]          | U              | Y | N | N | N | N | Y | Y | Y | N              |
| Assmann et al. [112]        | Y              | Y | N | N | N | Y | Y | Y | Y | Y              |
| Silva et al. [105]          | N              | N | N | N | N | N | Y | Y | Y | N              |
| Zmener et al. [103]         | N              | Y | N | N | N | N | Y | Y | Y | N              |
| Suzuki et al. [106]         | Y              | Y | N | N | N | N | Y | Y | Y | N              |
| Garcia et al. [93]          | U              | Y | N | N | N | N | N | Y | Y | N              |
| Oliveira et al. [94]        | Y              | Y | N | N | N | N | Y | Y | Y | Y              |
| Brasil et al. [107]         | Y              | Y | N | N | N | N | Y | N | Y | N              |
| Zmener et al. [95]          | N              | Y | N | N | N | N | Y | U | Y | N <sup>1</sup> |
| Suzuki et al. [108]         | Y              | Y | N | N | N | N | Y | Y | Y | N              |
| Tanamaru-Filho et al. [109] | U              | Y | N | N | N | N | Y | Y | Y | N              |
| Derakhshan et al. [104]     | Y              | Y | N | N | N | N | Y | N | Y | N              |
| Leonardo et al. [110]       | U              | Y | N | N | N | N | Y | Y | Y | N              |
| Campos-Pinto et al. [96]    | U              | U | N | N | N | N | N | Y | Y | N              |
| Zafalon et al. [97]         | N              | Y | N | N | N | N | N | Y | Y | N              |
| Onay et al. [98]            | U              | Y | N | N | N | N | N | U | Y | N              |
| Tanamaru-Filho et al. [113] | U              | U | N | N | N | N | Y | Y | Y | N              |
| Cintra et al. [111]         | N              | Y | N | N | N | N | Y | Y | Y | Y              |
| Kim et al. [100]            | N              | N | N | N | N | N | N | Y | Y | Y              |
| Zmener [101]                | U              | U | N | N | N | N | N | Y | Y | Y              |
| Figueiredo et al. [102]     | Y              | Y | N | N | N | N | N | U | Y | N              |

<sup>1</sup> The preparation of sealer (EndoREZ with accelerator) was performed with slight modifications of the manufacturer's instructions. Also, one new animal was added to one of the groups (unspecified) to replace a drop-out from the original population (reasons were not specified).

Abbreviations: N, No; U, Unclear; Y, Yes. Checklist items: 1 – Allocation sequence generation; 2 – Baseline characteristics; 3 – Allocation concealment; 4 – Random housing; 5 – Caregiver and/or researcher blinding; 6 – Random outcome assessment; 7 – Outcome assessor blinding; 8 – Incomplete outcome data; 9 – Selective outcome reporting; 10 – Other sources of bias

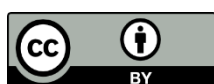

Supplement: materials-12-04113-s001.pdf [file materials-12-04113-s001.pdf]
